# Supplementary material
Source: PubMed Central journal article supplement (PMC4245990)
Supplement: bi500916y_si_001.pdf [file bi500916y_si_001.pdf]

# Supporting Information

## Biochemical, mechanistic, and spectroscopic characterization of metallo- $\beta$ -lactamase VIM-2

Mahesh Aitha<sup>†</sup>, Amy Marts<sup>†</sup>, Alex Bergstrom<sup>†</sup>, Abraham Jon Moller<sup>†</sup>, Lindsay Moritz<sup>†</sup>, Lucien Turner<sup>†</sup>, Jay C. Nix<sup>‡</sup>, Robert A. Bonomo<sup>§,¶</sup>, Richard C. Page<sup>†</sup>, David L. Tierney<sup>†</sup>, and Michael W. Crowder<sup>\*,†</sup>.

<sup>†</sup>*Department of Chemistry and Biochemistry, Miami University, 650 East High Street, Oxford, Ohio 45056, USA*

<sup>‡</sup>*Molecular Biology Consortium, Beamline 4.2.2, Advanced Light Source, Lawrence Berkeley National Laboratory, Berkeley, California 94720, USA*

<sup>§</sup> *Research Service, Louis Stokes Cleveland Department of Veterans Affairs Medical Center, 10701 East Boulevard, Cleveland, Ohio 44106, United States*

<sup>¶</sup>*Department of Medicine, Pharmacology, and Molecular Biology and Microbiology, Case Western Reserve University, 10900 Euclid Avenue, Cleveland, Ohio 44106, United States*

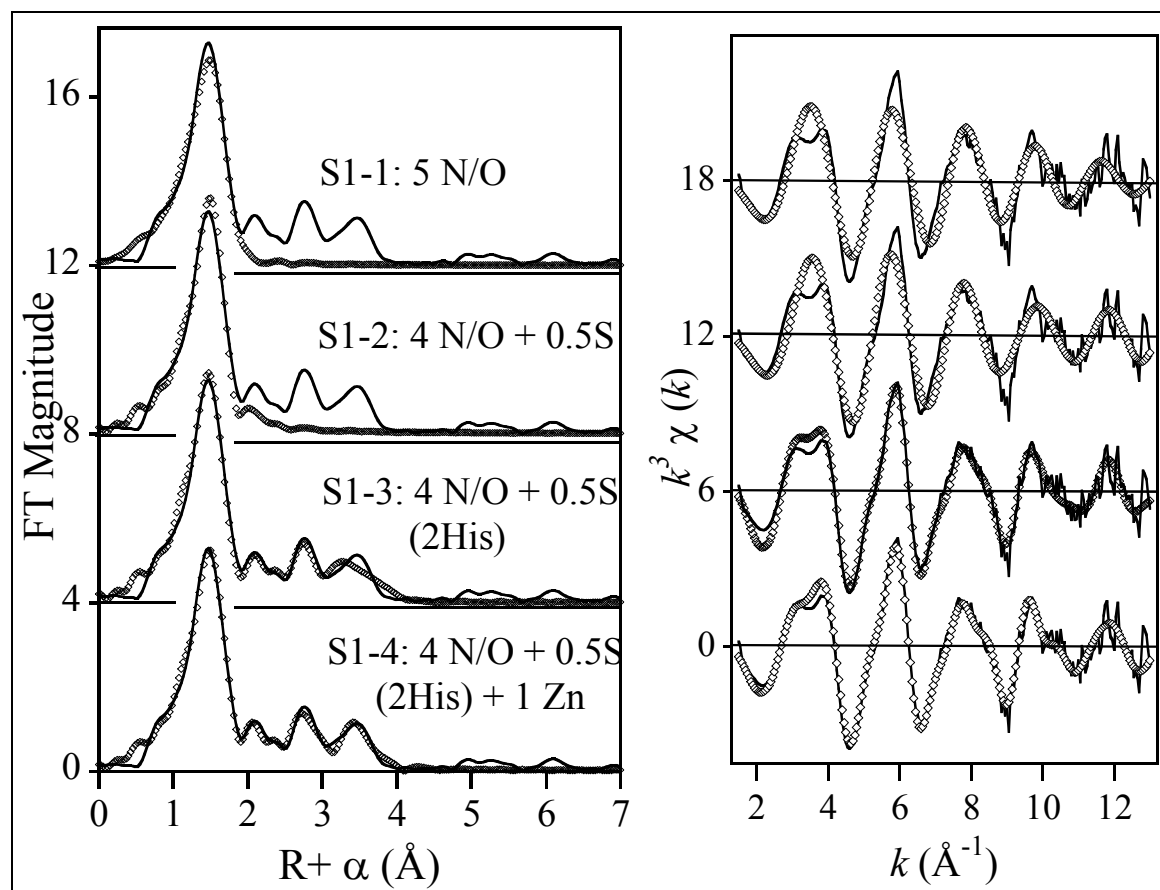

**Figure S1.** Fourier transforms (A) of Zn *K*-edge EXAFS (B) for as isolated (LB) VIM-2 (0.5 Zn). The solid lines represent the data, the open symbols represent the various fits, corresponding to **Table S1**.

**Table S1.** Fitting results for Zn *K*-edge EXAFS of as isolated (LB) VIM-2.<sup>a</sup>

| Fit  | Model                     | Zn-N/O     | Zn-S       | Zn-His <sup>b</sup>                       | Zn-Zn     | R <sub>r</sub> <sup>c</sup> | R <sub>u</sub> <sup>c</sup> |
|------|---------------------------|------------|------------|-------------------------------------------|-----------|-----------------------------|-----------------------------|
| S1-1 | 5 N/O                     | 2.00 (7.1) |            |                                           |           | 87                          | 186                         |
| S1-2 | 4 N/O + 0.5 S             | 2.01 (4.7) | 2.28 (4.1) |                                           |           | 33                          | 165                         |
| S1-3 | 4 N/O (2His)<br>+ 0.5S    | 2.00 (4.8) | 2.27 (4.9) | 2.91(3.4) 3.15(1.5)<br>4.13(23) 4.42(13)  |           | 39                          | 57                          |
| S1-4 | 4N/O(2His)+<br>0.5S+Zn-Zn | 2.00 (4.9) | 2.28 (6.0) | 2.94(5.6) 3.23(8.5)<br>4.14(9.3) 4.41(18) | 3.36(9.2) | 18                          | 48                          |

<sup>a</sup> Distances (Å) and disorder parameters (in parentheses,  $\sigma^2$  ( $10^{-3}$  Å<sup>2</sup>)) shown derive from integer or half-integer coordination number fits to filtered EXAFS data [ $\Delta k = 1.5-13$  Å<sup>-1</sup>;  $\Delta R = 0.5 - 2.2$  Å (fits 1-2), 0.3-4.0 Å (fits 3-4)].

<sup>b</sup> Imidazole multiple scattering paths represent combined paths, as described previously (see Materials and Methods).

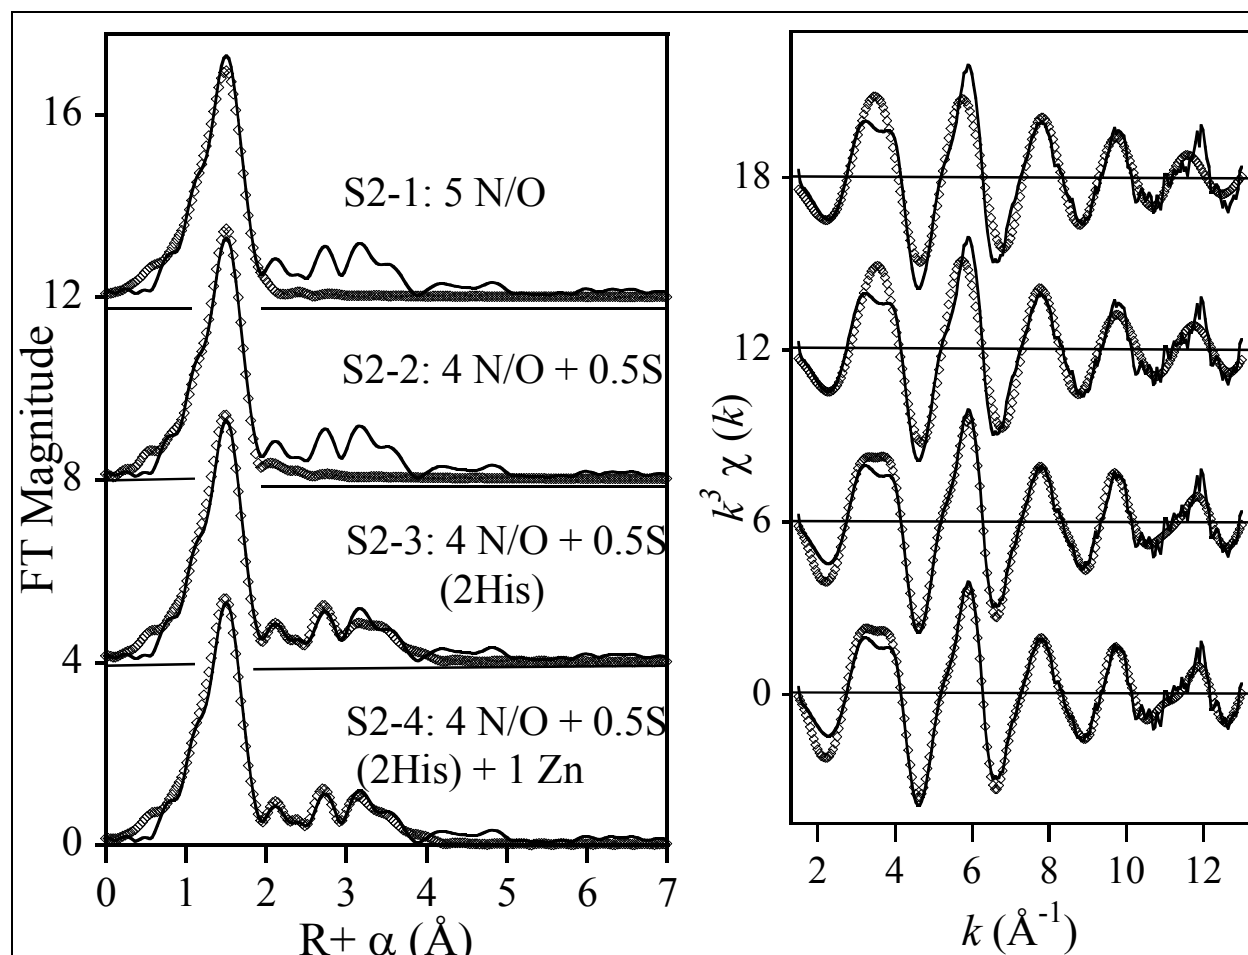

**Figure S2.** Fourier transforms (A) of Zn K-edge EXAFS (B) for 1Zn-VIM-2. The solid lines represent the data, the open symbols represent the various fits, corresponding to **Table S2**.

**Table S2.** Fitting results for Zn K-edge EXAFS of 1Zn-VIM-2.<sup>a</sup>

| Fit  | Model                  | Zn-N/O     | Zn-S       | Zn-His <sup>b</sup>                      | Zn-Zn    | R <sub>f</sub> <sup>c</sup> | R <sub>u</sub> <sup>c</sup> |
|------|------------------------|------------|------------|------------------------------------------|----------|-----------------------------|-----------------------------|
| S2-1 | 5 N/O                  | 2.01 (6.9) |            |                                          |          | 46                          | 119                         |
| S2-2 | 4 N/O + 0.5 S          | 2.00 (4.9) | 2.27 (5.4) |                                          |          | 14                          | 103                         |
| S2-3 | 4 N/O (2His)+ 0.5S     | 2.00 (5.1) | 2.27 (6.5) | 2.89(6.0) 3.11(3.7)<br>4.10(19) 4.40(16) |          | 22                          | 34                          |
| S2-4 | 4N/O(2His)+ 0.5S+Zn-Zn | 2.00 (5.2) | 2.27 (6.6) | 2.88(6.1) 3.10(2.8)<br>4.05(28) 4.40(15) | 3.37(15) | 17                          | 30                          |

<sup>a</sup> Distances (Å) and disorder parameters (in parentheses,  $\sigma^2$  ( $10^{-3}$  Å<sup>2</sup>)) shown derive from integer or half-integer coordination number fits to filtered EXAFS data [ $\Delta k = 1.5-13$  Å<sup>-1</sup>;  $\Delta R = 0.5 - 2.2$  Å (fits 1-2), 0.3-4.0 Å (fits 3-4)].

<sup>b</sup> Imidazole multiple scattering paths represent combined paths, as described previously (see Materials and Methods).

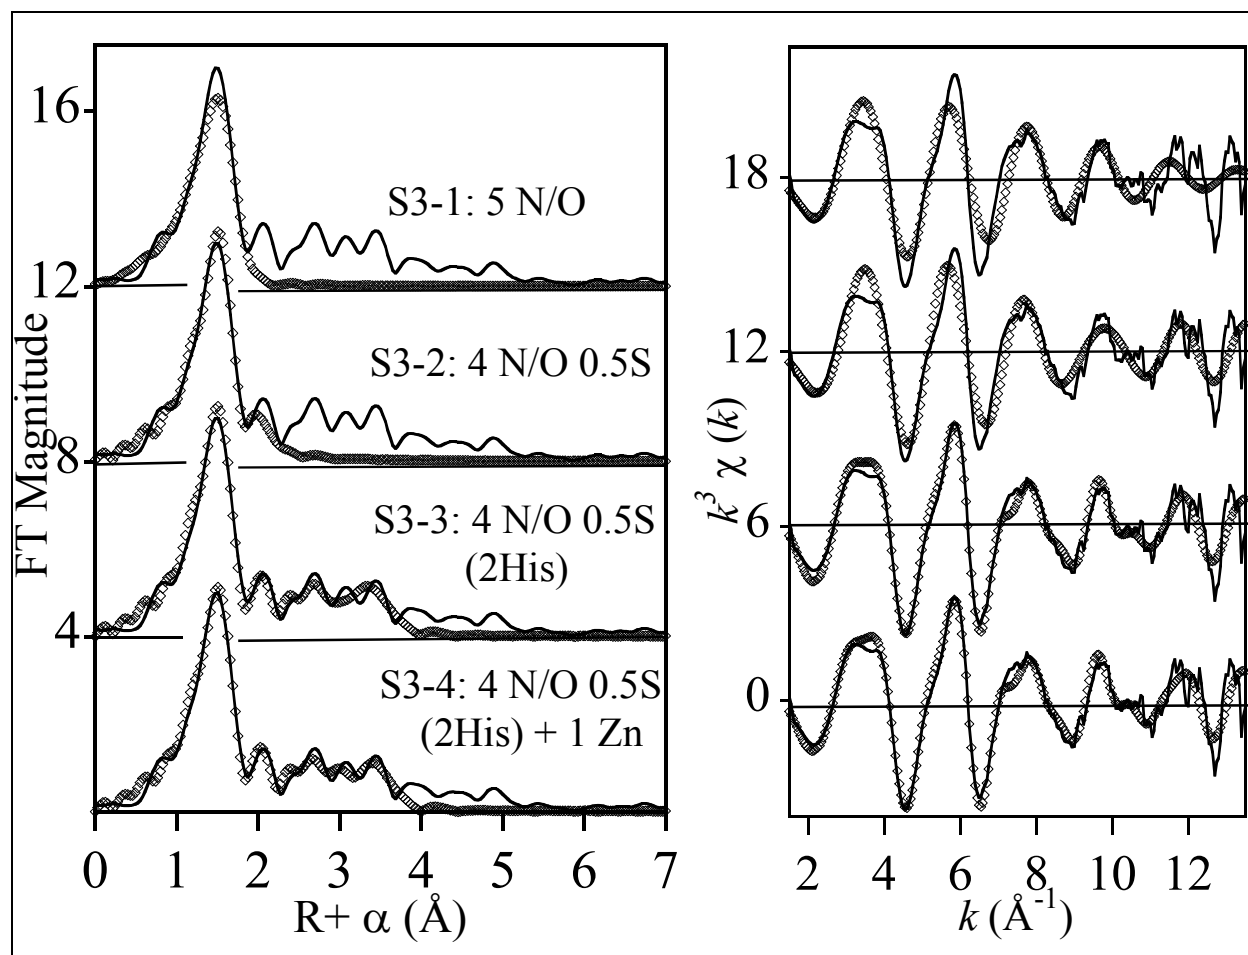

**Figure S3.** Fourier transforms (A) of Zn K-edge EXAFS (B) for 2Zn-VIM-2. The solid lines represent the data, the open symbols represent the various fits, corresponding to **Table S3**.

**Table S3.** Fitting results for Zn K-edge EXAFS of 2Zn-VIM-2.<sup>a</sup>

| Fit  | Model                  | Zn-N/O     | Zn-S       | Zn-His <sup>b</sup>                       | Zn-Zn    | R <sub>r</sub> <sup>c</sup> | R <sub>u</sub> <sup>c</sup> |
|------|------------------------|------------|------------|-------------------------------------------|----------|-----------------------------|-----------------------------|
| S3-1 | 5 N/O                  | 2.02 (7.4) |            |                                           |          | 127                         | 222                         |
| S3-2 | 4 N/O + 0.5 S          | 2.01 (5.1) | 2.31 (2.9) |                                           |          | 22                          | 172                         |
| S3-3 | 4 N/O (2His)+ 0.5S     | 2.01 (5.0) | 2.31 (3.2) | 2.93(4.0) 3.15(4.0)<br>4.11(9.3) 4.41(19) |          | 23                          | 61                          |
| S3-4 | 5N/O(2His)+ 0.5S+Zn-Zn | 2.01 (5.1) | 2.31 (3.2) | 2.94(4.4) 3.20(8.3)<br>4.12(8.2) 4.40(22) | 3.36(15) | 17                          | 60                          |

<sup>a</sup> Distances (Å) and disorder parameters (in parentheses,  $\sigma^2$  ( $10^{-3}$  Å<sup>2</sup>)) shown derive from integer or half-integer coordination number fits to filtered EXAFS data [ $\Delta k = 1.5-13$  Å<sup>-1</sup>;  $\Delta R = 0.5 - 2.2$  Å (fits 1-2), 0.3-4.0 Å (fits 3-4)].

<sup>b</sup> Imidazole multiple scattering paths represent combined paths, as described previously (see Materials and Methods).

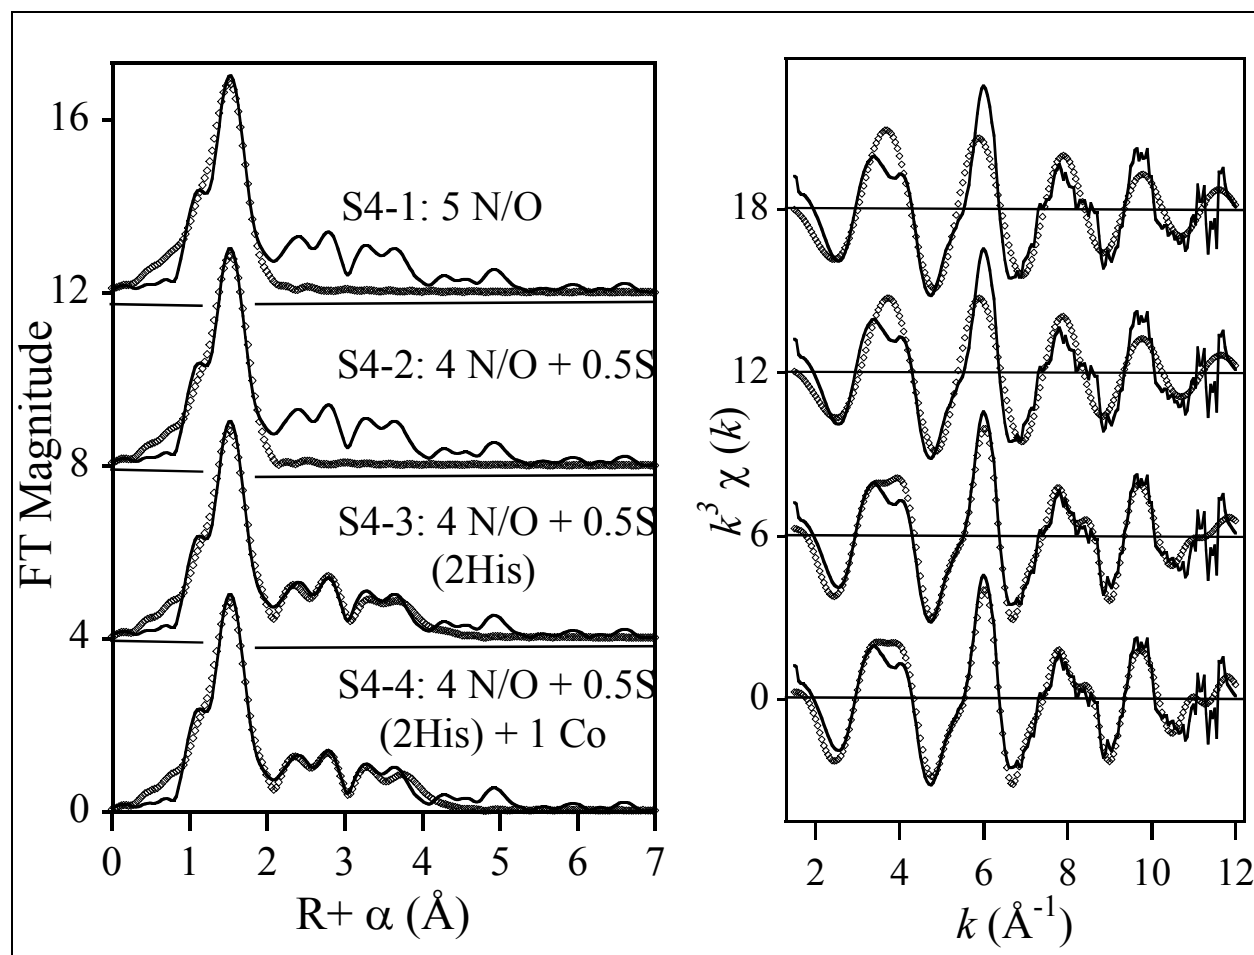

**Figure S4.** Fourier transforms (A) of Co K-edge EXAFS (B) for as isolated (MM) VIM-2 containing 0.5 eq of Co. The solid lines represent the data, the open symbols represent the various fits, corresponding to **Table S4**.

**Table S4.** Fitting results for Co K-edge EXAFS of as isolated (MM) VIM-2.<sup>a</sup>

| Fit  | Model                  | Co-N/O     | Co-S       | Co-His <sup>b</sup>                       | Co-Co    | R <sub>f</sub> <sup>c</sup> | R <sub>u</sub> <sup>c</sup> |
|------|------------------------|------------|------------|-------------------------------------------|----------|-----------------------------|-----------------------------|
| S4-1 | 5 N/O                  | 2.04 (7.0) |            |                                           |          | 41                          | 247                         |
| S4-2 | 4 N/O + 0.5 S          | 2.03 (5.1) | 2.27 (4.0) |                                           |          | 28                          | 230                         |
| S4-3 | 4 N/O (2His)+ 0.5S     | 2.04 (6.1) | 2.26 (12)  | 2.98(4.5) 3.20(1.1)<br>4.20(7.5) 4.56(12) |          | 30                          | 86                          |
| S4-4 | 5N/O(2His)+ 0.5S+Co-Co | 2.04 (6.0) | 2.26 (11)  | 2.98(4.8) 3.19(1.0)<br>4.15(18) 4.55(11)  | 3.51(15) | 24                          | 78                          |

<sup>a</sup> Distances (Å) and disorder parameters (in parentheses,  $\sigma^2$  ( $10^{-3}$  Å<sup>2</sup>)) shown derive from integer or half-integer coordination number fits to filtered EXAFS data [ $\Delta k = 1.5-12$  Å<sup>-1</sup>;  $\Delta R = 0.5 - 2.2$  Å (fits 1-2), 0.3-4.0 Å (fits 3-4)].

<sup>b</sup> Imidazole multiple scattering paths represent combined paths, as described previously (see Materials and Methods).

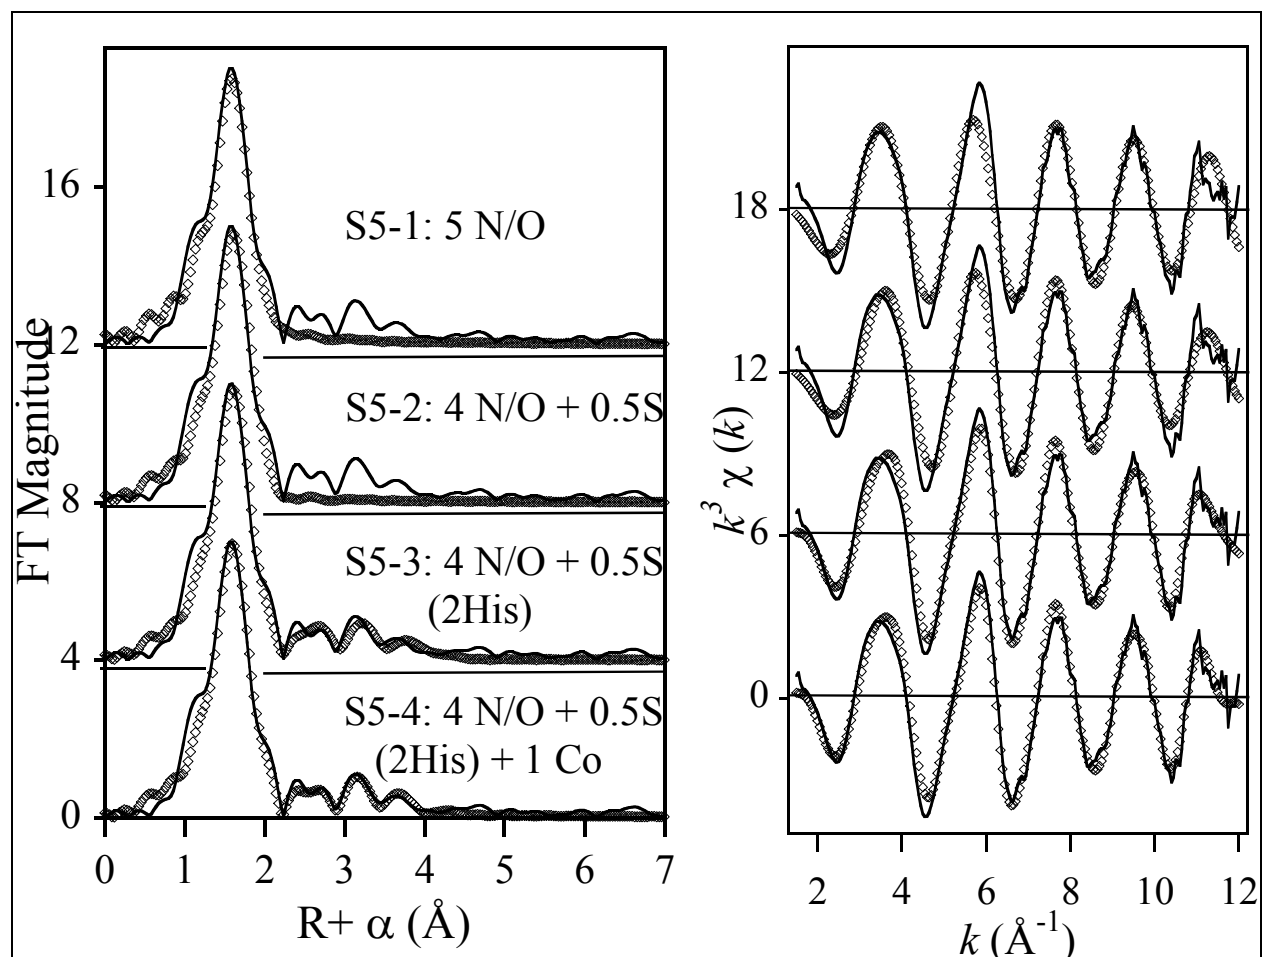

**Figure S5.** Fourier transforms (A) of Co K-edge EXAFS (B) for 1Co-VIM-2. The solid lines represent the data, the open symbols represent the various fits, corresponding to **Table S5**.

**Table S5.** Fitting results for Co K-edge EXAFS of 1Co-VIM-2.<sup>a</sup>

| Fit  | Model                  | Co-N/O     | Co-S       | Co-His <sup>b</sup>                       | Co-Co     | R <sub>f</sub> <sup>c</sup> | R <sub>u</sub> <sup>c</sup> |
|------|------------------------|------------|------------|-------------------------------------------|-----------|-----------------------------|-----------------------------|
| S5-1 | 5 N/O                  | 2.08 (3.5) |            |                                           |           | 37                          | 90                          |
| S5-2 | 4 N/O + 0.5 S          | 2.07 (2.1) | 2.29 (2.4) |                                           |           | 23                          | 79                          |
| S5-3 | 4 N/O (2His)<br>+ 0.5S | 2.07 (3.3) | 2.28 (1.8) | 3.00(5.6) 3.14(2.5)<br>4.10(6.4) 4.59(14) |           | 34                          | 45                          |
| S5-4 | 5N/O(2His)+ 0.5S+Co-Co | 2.07 (3.0) | 2.29 (2.1) | 3.01(5.6) 3.15(0.5)<br>4.10(6.9) 4.59(17) | 3.52(7.3) | 16                          | 39                          |

<sup>a</sup> Distances (Å) and disorder parameters (in parentheses,  $\sigma^2$  ( $10^{-3}$  Å<sup>2</sup>)) shown derive from integer or half-integer coordination number fits to filtered EXAFS data [ $\Delta k = 1.5-12$  Å<sup>-1</sup>;  $\Delta R = 0.5 - 2.2$  Å (fits 1-2), 0.3-4.0 Å (fits 3-4)].

<sup>b</sup> Imidazole multiple scattering paths represent combined paths, as described previously (see Materials and Methods).

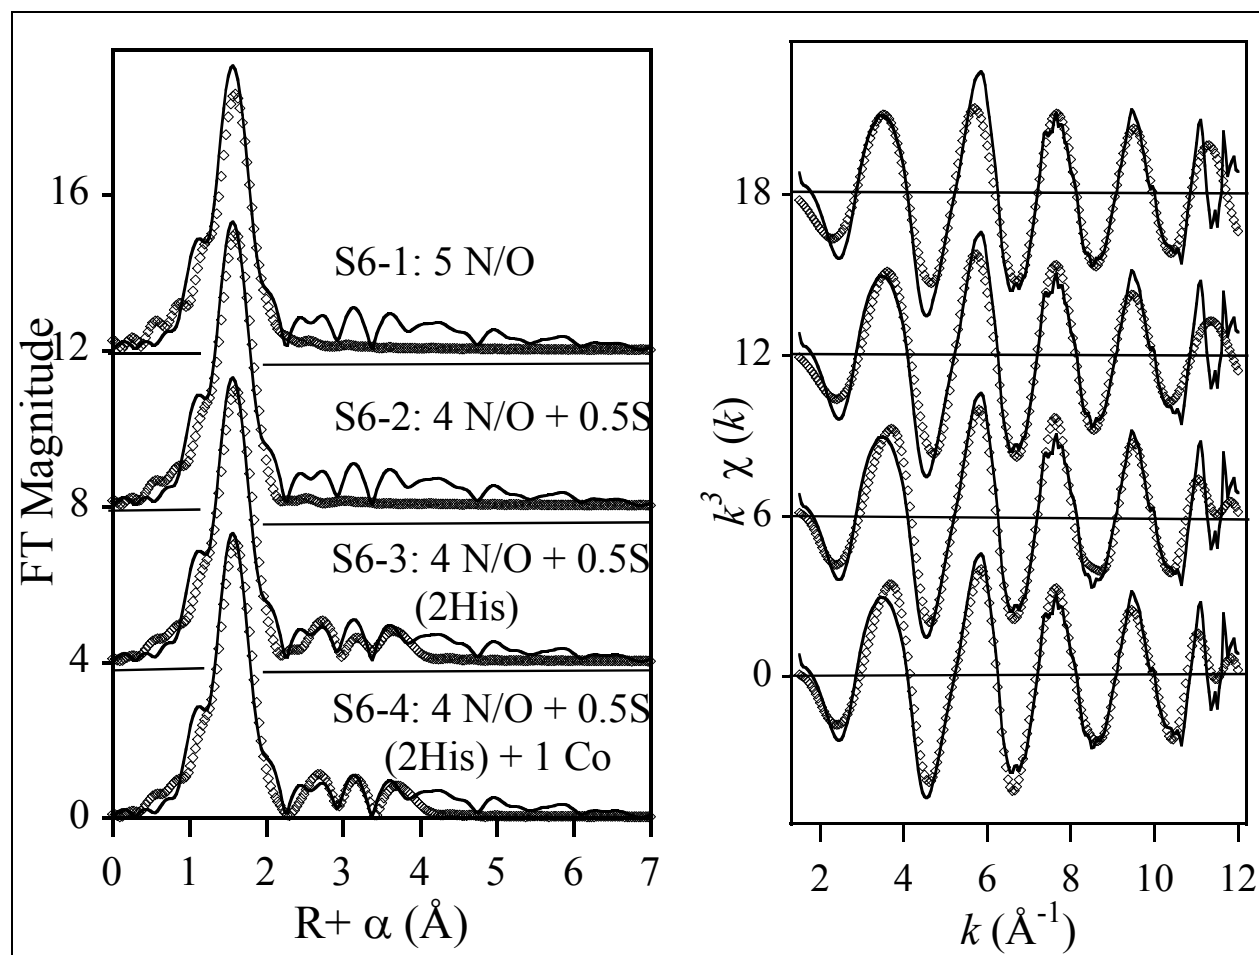

**Figure S6.** Fourier transforms (A) of Zn K-edge EXAFS (B) for 2Co-VIM-2. The solid lines represent the data, the open symbols represent the various fits, corresponding to **Table S6**.

**Table S6.** Fitting results for Zn K-edge EXAFS of 2Co-VIM-2.<sup>a</sup>

| Fit  | Model                  | Co-N/O     | Co-S       | Co-His <sup>b</sup>                       | Co-Co     | R <sub>f</sub> <sup>c</sup> | R <sub>u</sub> <sup>c</sup> |
|------|------------------------|------------|------------|-------------------------------------------|-----------|-----------------------------|-----------------------------|
| S6-1 | 5 N/O                  | 2.09 (2.1) |            |                                           |           | 43                          | 118                         |
| S6-2 | 4 N/O + 0.5 S          | 2.07 (2.2) | 2.31 (1.3) |                                           |           | 26                          | 99                          |
| S6-3 | 4 N/O (2His)<br>+ 0.5S | 2.07 (2.4) | 2.31 (0.9) | 3.00(3.9) 3.14(1.6)<br>4.29(2.9) 4.58(26) |           | 72                          | 62                          |
| S6-4 | 5N/O(2His)+ 0.5S+Co-Co | 2.07 (2.3) | 2.31 (0.8) | 3.01(4.0) 3.15(0.8)<br>4.28(2.2) 4.58(33) | 3.51(9.1) | 45                          | 54                          |

<sup>a</sup> Distances (Å) and disorder parameters (in parentheses,  $\sigma^2$  ( $10^{-3}$  Å<sup>2</sup>)) shown derive from integer or half-integer coordination number fits to filtered EXAFS data [ $\Delta k = 1.5-12$  Å<sup>-1</sup>;  $\Delta R = 0.5 - 2.2$  Å (fits 1-2), 0.3-4.0 Å (fits 3-4)].

<sup>b</sup> Imidazole multiple scattering paths represent combined paths, as described previously (see Materials and Methods).

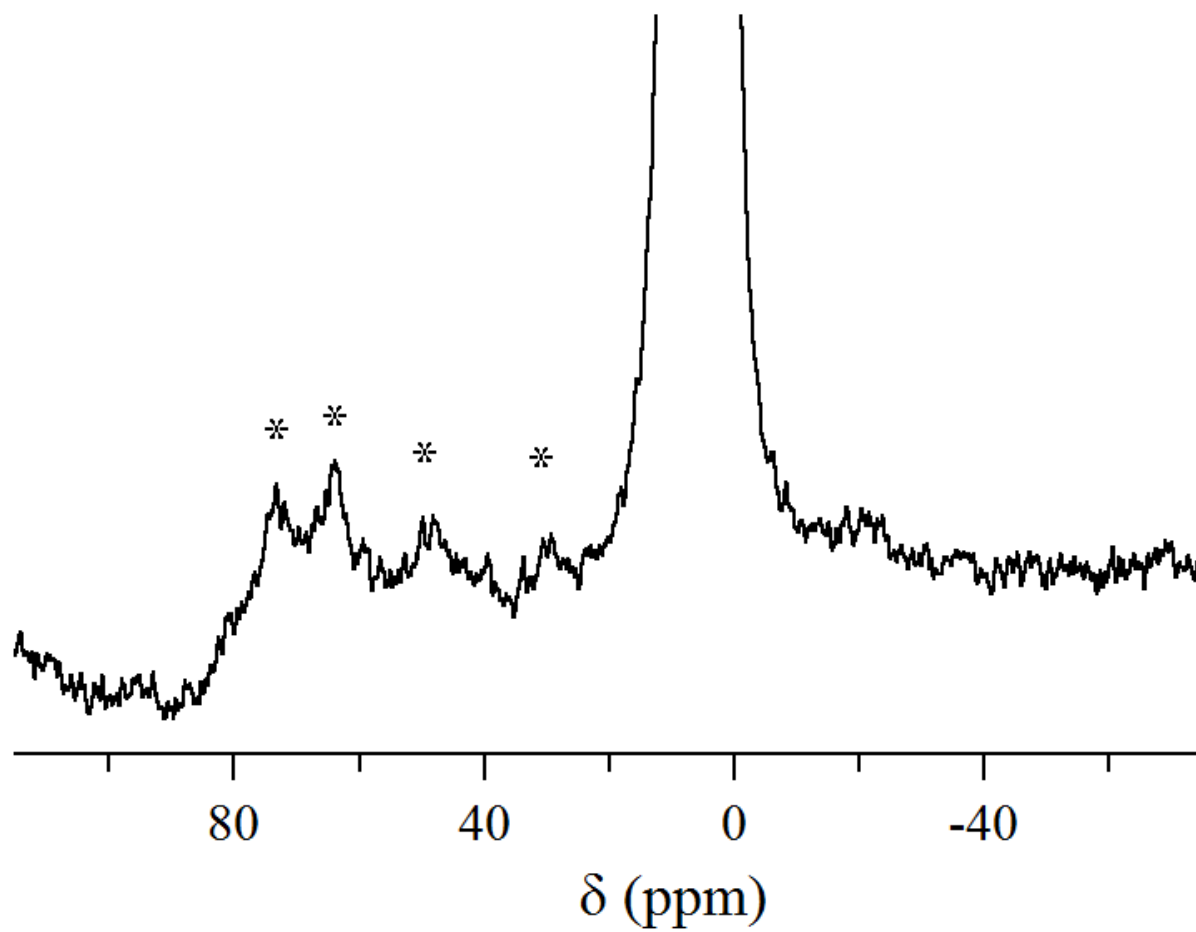

**Figure S7.** 200 MHz <sup>1</sup>H NMR spectrum of 2Co-VIM-2 in 90 % H<sub>2</sub>O. Solvent exchangeable protons are indicated by an asterisk.



**Table S7.** X-ray data collection and structure refinement.

| <i>Pseudomonas aeruginosa</i> VIM-2      |                                                             |
|------------------------------------------|-------------------------------------------------------------|
| <b>Data Collection</b>                   |                                                             |
| Beam Line                                | ALS 4.2.2                                                   |
| Wavelength (Å)                           | 1.0000                                                      |
| Space group                              | <i>I</i> 222                                                |
| <b>Cell dimensions</b>                   |                                                             |
| <i>a</i> , <i>b</i> , <i>c</i> (Å)       | 68.3, 78.3, 79.8                                            |
| $\alpha$ , $\beta$ , $\gamma$ (°)        | 90, 90, 90                                                  |
| Resolution (Å) <sup>a</sup>              | 55.87-1.55 (1.63-1.55)                                      |
| $R_{merge}$ <sup>b</sup>                 | 0.070 (0.447)                                               |
| $\langle I/\sigma \rangle$               | 16.9 (4.0)                                                  |
| Wilson <i>B</i> factor (Å <sup>2</sup> ) | 15.17                                                       |
| Completeness (%)                         | 99.8 (99.2)                                                 |
| Redundancy                               | 7.2 (7.2)                                                   |
| No. of reflections                       | 228,457                                                     |
| No. of unique reflections                | 32,317                                                      |
| <b>Refinement</b>                        |                                                             |
| Resolution (Å)                           | 55.87-1.55                                                  |
| No. reflections for refinement           | 31,217                                                      |
| $R_{work}/R_{free}$                      | 0.176 / 0.209                                               |
| No. atoms                                | 1,992                                                       |
| Protein                                  | 1,714                                                       |
| Water                                    | 267                                                         |
| Zinc                                     | 3                                                           |
| Acetate                                  | 8                                                           |
| <b>Average <i>B</i> factors</b>          |                                                             |
| Protein                                  | 22.4                                                        |
| Water                                    | 33.8                                                        |
| Zinc                                     | 20.2                                                        |
| Acetate                                  | 20.4                                                        |
| <b>R.m.s deviations</b>                  |                                                             |
| Bond lengths (Å)                         | 0.007                                                       |
| Bond angles (°)                          | 1.049                                                       |
| <b>Ramachandran plot statistics</b>      |                                                             |
| Favored regions % (#)                    | 97.4 (224/230)                                              |
| Allowed regions % (#)                    | 100.0 (230/230)                                             |
| Disallowed regions                       | 0.0                                                         |
| <b>MolProbity validation statistics</b>  |                                                             |
| C $\beta$ deviations >0.25Å              | 0                                                           |
| MolProbity clash score                   | 2.96 (99 <sup>th</sup> percentile, N=730, 1.550Å ± 0.25Å)   |
| MolProbity score                         | 1.21 (98 <sup>th</sup> percentile, N=6,779, 1.550Å ± 0.25Å) |
| PDB ID                                   | 4NQ2                                                        |

<sup>a</sup> Values in parentheses are for the highest resolution shell.

<sup>b</sup> The merging *R* factor is defined as 
$$R_{merge} = \frac{\sum_{hkl} \sum_i |I_i(hkl) - \overline{I(hkl)}|}{\sum_{hkl} \sum_i I_i(hkl)}$$
